# Supplementary material for: Modulation of Malaria Infection in Anopheles gambiae Mosquitoes Exposed to Natural Midgut Bacteria
Source: PLoS One. 2013 Dec 6;8(12):e81663. doi: 10.1371/journal.pone.0081663 (PMC3855763; doi:10.1371/journal.pone.0081663)
Supplement: Table S3 — Mosquito infections in PBS control and bacterial challenged mosquitoes for each gametocyte donor. (suite). (XLS) [file pone.0081663.s004.xls]

## Sheet: Feuil1
Table S3. Mosquito infections in PBS control and bacterial challenged mosquitoes for each gametocyte donor (suite).
		PBS				Asp				BP				CO
Gametocyte carrier		No inf. /no diss.	Mean oocyst/midgut [range]	Median (1st-3rd quartile)		No inf. /no diss.	Mean oocyst/midgut [range]	Median (1st-3rd quartile)		No inf. /no diss.	Mean oocyst/midgut [range]	Median (1st-3rd quartile)		No inf. /no diss.	Mean oocyst/midgut [range]	Median (1st-3rd quartile)
C078		39/43	6.02 [0-17]	4 (2-10)		23/29	3.34 [0-10]	3 (1-5)		27/30	4.16 [0-10]	4 (2-6.75)		nd	nd	nd
C079		29/30	13.10 [1-27]	14 (10-16)		7/8	4.87 [0-13]	4.5 (3-5.25)		20/20	8.25 [1-21]	6 (3-14.25)		nd	nd	nd
C080		34/34	27.06 [4-101]	19.5 (10.25-37.75)		26/32	13.62 [0-43]	11 (1-21.5)		22/27	11.19 [0-36]	9 (1-20)		nd	nd	nd
C081		22/39	2.26 [0-17]	1 (0-3)		26/40	0.82 [0-9]	0 (0-1)		33/46	3.02 [0-17]	2 (0-3.75)		nd	nd	nd
C086		5/35	0.14 [0-1]	0 (0-0)		4/32	0.16 [0-2]	0 (0-0)		1/16	0.06 [0-1]	0 (0-0)		5/42	0.12 [0-1]	0 (0-0)
C088		12/70	0.26 [0-3]	0 (0-0)		6/50	0.14 [0-2]	0 (0-0)		15/68	0.29 [0-3]	0 (0-0)		25/101	0.34 [0-1]	0 (0-0)
C089		14/22	3.27 [0-12]	2.5 (0-5)		13/16	7.50 [0-30]	4.5 (1-8.25)		5/12	2.42 [0-14]	0 (0-4)		2/5	0.80 [0-2]	0 (0-2)
C095		9/37	0.30 [0-2]	0 (0-0)		9/44	0.22 [0-2]	0 (0-0)		19/57	0.44 [0-2]	0 (0-1)		24/57	0.56 [0-3]	0 (0-1)
C096		33/70	1.46 [0-13]	0 (0-2)		30/45	2.53 [0-12]	2 (0-3)		5/36	0.36 [0-7]	0 (0-0)		23/54	1.00 [0-9]	0 (0-1)
C098		53/56	50.57 [0-143]	50 (24-73)		nd	nd	nd		19/20	45.80 [0-104]	42.5 (26-66.25)		21/29	20.62 [0-93]	17 (0-32)
C103		65/69	15.26 [0-42]	14 (9-22)		nd	nd	nd		21/29	5.10 [0-26]	3 (0-7)		2/22	0.27 [0-4]	0 (0-0)
C109		20/37	2.78 [0-15]	1 (0-4)		nd	nd	nd		7/18	0.89 [0-4]	0 (0-1.75)		13/18	3.33 [0-12]	3 (0.5-4.75)
C114		15/28	2.60 [0-13]	1 (0-4.25)		nd	nd	nd		6/29	0.38 [0-5]	0 (0-0)		12/28	1.75 [0-11]	0 (0-2)
C115		54/62	14.55 [0-44]	14 (6.25-21)		nd	nd	nd		17/20	15.95 [0-58]	12 (3.5-22.5)		12/17	9.82 [0-34]	8 (0-15)
C116		18/22	5.23 [0-18]	4.5 (2-7)		nd	nd	nd		10/22	2.32 [0-9]	0 (0-4.75)		19/29	2.52 [0-12]	1 (0-4)
C118		15/27	1.63 [0-8]	1 (0-2)		nd	nd	nd		5/20	0.50 [0-4]	0 (0-0.25)		17/31	1.06 [0-6]	1 (0-1.5)
C121		19/33	3.67 [0-17]	1 (0-6)		nd	nd	nd		1/12	0.67 [0-8]	0 (0-0)		12/28	1.82 [0-12]	0 (0-2)
PBS, Control group; Co, Comamonas spp ; BP, Bacillus pumilus ; Asp, Acinetobacter septicus
No inf, number of infected mosquitoes; no diss, number of dissected mosquitoes
