# Supplementary material for: Modulation of Malaria Infection in Anopheles gambiae Mosquitoes Exposed to Natural Midgut Bacteria
Source: PLoS One. 2013 Dec 6;8(12):e81663. doi: 10.1371/journal.pone.0081663 (PMC3855763; doi:10.1371/journal.pone.0081663)
Supplement: Table S4 — Efficacy of bacterial isolates at reducing Plasmodium falciparum infection intensity and prevalence. (XLS) [file pone.0081663.s005.xls]

## Sheet: Feuil1
Table S3. Efficacy of bacterial isolates at reducing Plasmodium falciparum infection intensity and prevalence
Bacteria	Mean oocyst intensity in PBS control group (95% CI)	Mean oocyst intensity in experiment group (95% CI)	Efficacy at reducing intensity (95% CI)	P-value	Mean prevalence in PBS control group (95% CI)	Mean prevalence in experiment group (95% CI)	Efficacy at reducing prevalence (95% CI)	P-value	Nb of replicates
EC	5.42 (4.61; 6.27)	2.68 (2.05; 3.38)	46.76 (31.65; 58.53)	<0.0001	0.655 (0.60; 0.70)	0.393 (0.33; 0.45)	40.90 (11.75; 27.32)	<0.001	12
Ser	4.14 (3.37; 5.00)	1.95 (1.49; 2.47)	51.97 (36.92; 63.44)	<0.0001	0.621 (0.56; 0.67)	0.412 (0.35; 0.47)	36.20 (7.92: 23.39)	<0.001	10
Psp	5.57 (4.65; 6.55)	1.72(1.31; 2.17)	53.67 (37.09; 65.88)	<0.0001	0.668 (0.60; 0.72)	0.389 (0.31; 0.47)	41.20 (10.19; 30.65)	<0.001	10
Esp	5.42 (4.61; 6.29)	2.97 (2.48; 3.47)	33.61 (19.28; 45.39)	<0.0001	0.655 (0.60; 0.70)	0.525 (0.46; 0.58)	14.80 (0.91; 11.51)	0.016	12
BP	9.96 (8.70; 11.33)	4.76 (3.88; 5.71)	38.64 (28.81; 47.11)	<0.0001	0.639 (0.60; 0.67)	0.483 (0.44; 0.52)	21.30 (4.82; 15.69)	<0.001	12
Co	9.59 (8.12; 11.15)	2.53 (1.92. 3.22)	32.40 (19.18 ; 43.45)	<0.0001	0.585 (0.54; 0.62)	0.406 (0.36; 0.45)	18.60 (2.05; 11.35)	0.002	12
Asp	4.91 (3.91; 6.02)	2.91 (2.28; 3.61)	22.48 (3.31; 37.84)	0.0113	0.518 (0.46; 0.57)	0.439 (0.38; 0.49)	10.20 (-1.45; 9.45)	0.194	8
